# Supplementary material for: Synthesis of a polyaminocarboxylate-based aluminum complex and its structural studies using 1H{13C}-HMBC NMR and a Karplus-type function
Source: Royal Society of Chemistry journal article supplement (doi:10.1039/d2dt01702d), 2022-01-01
Supplement: d2dt01702d1.pdf [file d2dt01702d1.pdf]

Electronic Supplementary Information

**Synthesis of a polyaminocarboxylate-based aluminum complex  
and its structural studies using  $^1\text{H}\{^{13}\text{C}\}$ -HMBC NMR and a Karplus-type function**

Karel D. Klika,<sup>†</sup> Rana Alsalm, <sup>‡</sup> Mohammad Eftekhari<sup>§</sup> and Ata Makarem<sup>\*‡</sup>

<sup>†</sup>German Cancer Research Center (DKFZ), Molecular Structure Analysis, INF 280, D-69120 Heidelberg, Germany

<sup>‡</sup>University of Hamburg, Institute of Pharmacy, Bundesstraße 45, D-20146 Hamburg, Germany

<sup>§</sup> University of Neyshabur, Faculty of Sciences, Department of Chemistry, Neyshabur, Iran.

<sup>\*</sup>corresponding author and project leader

**Table of Contents**

|                                                                                                                                                                                                                 |       |
|-----------------------------------------------------------------------------------------------------------------------------------------------------------------------------------------------------------------|-------|
| General methodology .....                                                                                                                                                                                       | SI-2  |
| Synthesis of 2,2'-[ethane-1,2-diylbis({2-hydroxy-5-[2-(4-phenyl-1 <i>H</i> -1,2,3-triazol-1-yl)ethyl]benzyl}<br>azanediy)]diacetic acid ( <i>HBED-NN chelator</i> ) .....                                       | SI-2  |
| Synthesis of sodium aluminum(III){2,2'-[ethane-1,2-diylbis({2-oxido-5-[2-(4-phenyl-1 <i>H</i> -1,2,3-triazol-1-<br>yl)ethyl]benzyl}azanediy)]diacetate} ( <i>[Al-HBED-NN]<sup>-</sup>Na<sup>+</sup></i> ) ..... | SI-3  |
| Structural data of isomers I–III<br>(Tables S1-5, computational models, and portions of the HMBC spectrum) .....                                                                                                | SI-5  |
| Copies of NMR and MS Spectra .....                                                                                                                                                                              | SI-11 |
| References.....                                                                                                                                                                                                 | SI-14 |

## General methodology

Chemicals and reagents were purchased from Fisher, Merck Scientific, TCI, VWR Chemicals and Sigma-Aldrich. NMR spectra were measured at 25 °C using a Bruker Avance III NMR instrument at a field strength of 9.4 T operating at 400 MHz for  $^1\text{H}$  nuclei and 100 MHz for  $^{13}\text{C}$  nuclei. Chemical shifts ( $\delta$ ) are reported in ppm relative to TMS ( $\delta_{\text{H}} = 0$  ppm and  $\delta_{\text{C}} = 0$  ppm) and spectra were referenced internally using the solvent peaks<sup>S1</sup> as secondary references ( $^1\text{H}$ :  $\delta_{\text{MeOD}} = 3.31$  ppm and  $\delta_{\text{DMSO}} = 2.50$  ppm;  $^{13}\text{C}$ :  $\delta_{\text{MeOD}} = 49.00$  ppm,  $\delta_{\text{DMSO}} = 39.52$  ppm). Coupling constants ( $J$ ) are reported in Hz. The following abbreviations are used: s – singlet, d – doublet, ho – higher order, t – triplet, m – multiplet and br – broad. Signal assignments were made using 2D COSY, HMBC and HSQC spectra. The program TopSpin 3.6.1 was used for the processing and analysis of NMR spectra. High resolution mass spectra were recorded using a Bruker ApexQe hybrid 9.4 T FT-ICR instrument.

Density functional theory (DFT) calculations were run using Gaussian 09 software; default parameters for the self-consistent field (SCF) and geometry convergence criteria were employed throughout. Geometry optimization and frequency calculations were performed using a b3lyp functional and a 6-31g(d,p) basis set. The structures were optimized without symmetry constraints using a polarizable continuum model (PCM) to simulate the solution phase. Calculations were run using the SCRF keyword and selecting DMSO as the solvent.

## Synthesis of 2,2'-[ethane-1,2-diylbis({2-hydroxy-5-[2-(4-phenyl-1H-1,2,3-triazol-1-yl)ethyl]benzyl} azanediyl)]diacetic acid (*HBED-NN chelator*)

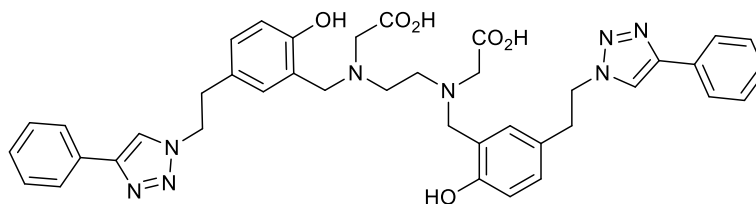

**HBED-NN Chelator ( $\text{C}_{40}\text{H}_{42}\text{N}_8\text{O}_6$ , MW: 730.83 g mol<sup>-1</sup>)**

The HBED-NN chelator was prepared according to our previously reported procedure (colorless solid; 0.40 g, 0.54 mmol, 58%).<sup>S2</sup>

$^1\text{H}$  NMR (400 MHz, MeOD, 25 °C):  $\delta$  = 8.13 (s, 2H, CHN), 7.74 (d, 4H,  $^3J_{\text{H,H}}$  = 7.8 Hz, Ph-substituent, *ortho*-H), 7.40 (t, 4H,  $^3J_{\text{H,H}}$  = 7.8 Hz, Ph-substituent, *meta*-H), 7.32 (t, 2H,  $^3J_{\text{H,H}}$  = 7.8 Hz, Ph-substituent, *para*-H), 7.03 (dd, 2H,  $^3J_{\text{H,H}}$  = 8.3 Hz,  $^4J_{\text{H,H}}$  = 1.44 Hz, CHCHCO), 6.97 (s, br, 2H, CCHC), 6.78 (d, 2H,  $^3J_{\text{H,H}}$  = 8.3 Hz, CHCHCO), 4.63 (t, 4H,  $^3J_{\text{H,H}}$  = 6.7 Hz CCH<sub>2</sub>CH<sub>2</sub>N), 3.99 (s, 4H, <sup>Bn</sup>CH<sub>2</sub>), 3.57 (s, 4H, CH<sub>2</sub>CO<sub>2</sub>), 3.15 (t, 4H,  $^3J_{\text{H,H}}$  = 6.7 Hz, CCH<sub>2</sub>CH<sub>2</sub>N), 3.05 (s, 4H, N-C<sub>2</sub>H<sub>4</sub>-N) ppm.  $^{13}\text{C}\{^1\text{H}\}$  NMR (100 MHz, MeOD, 25 °C):  $\delta$  = 171.8 (CO<sub>2</sub>), 158.6 (COH), 148.6 (NCCH), 133.8 (CCHC), 132.3 (CHCHCO), 131.6 (Ph-substituent, *ipso*-C), 130.0 (Ph-substituent, *meta*-C), 129.4 (Ph-substituent, *para*-C), 126.6 (Ph-substituent, *ortho*-C), 122.4 (CHN), 120.2 (CCH<sub>2</sub>CH<sub>2</sub>N and <sup>Bn</sup>CH<sub>2</sub>C), 116.9 (CHCHCO), 54.2 (<sup>Bn</sup>C), 54.0 (CH<sub>2</sub>CO<sub>2</sub>), 52.9 (CCH<sub>2</sub>CH<sub>2</sub>N), 50.9 (N-C<sub>2</sub>H<sub>4</sub>-N), 36.5 (CCH<sub>2</sub>CH<sub>2</sub>N) ppm.

**Synthesis of sodium aluminum(III){2,2'-[ethane-1,2-diylbis{2-oxido-5-[2-(4-phenyl-1H-1,2,3-triazol-1-yl)ethyl]benzyl}azanediyl)]diacetate} ([Al-HBED-NN]<sup>-</sup>Na<sup>+</sup>)**

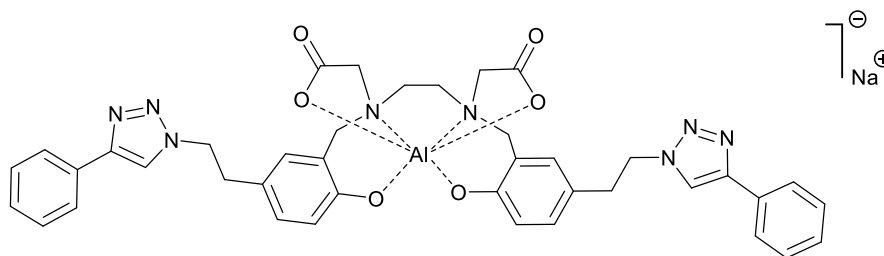

**[Al-HBED-NN]<sup>-</sup>Na<sup>+</sup> (C<sub>40</sub>H<sub>38</sub>AlN<sub>8</sub>NaO<sub>6</sub>, MW: 776.77 g mol<sup>-1</sup>)**

Stock solution **Al1**: In a 1 mL flask, 550  $\mu\text{L}$  of an aqueous solution of NaOAc (1 M) were mixed with 100  $\mu\text{L}$  of an aqueous AlCl<sub>3</sub> solution (1 M). The resulting pH was ~4.

To a solution of the HBED-NN chelator (20 mg, 27  $\mu\text{mol}$ ) in 2 mL of DMF at room temperature were added 275  $\mu\text{L}$  of fresh **Al1** (1.6 eq Al<sup>3+</sup> and 8.8 eq NaOAc). The reaction mixture was stirred at 90 °C for 5 min following which it was cooled to room temperature, diluted with water and then centrifuged. The solid residue was washed with water followed by a dilute NaHCO<sub>3</sub> solution (or alternatively, with THF) and then dried *in vacuo* to give the desired product as a colorless solid (17 mg, 22  $\mu\text{mol}$ , 80%).  $^1\text{H}$  NMR (400 MHz, DMSO, 25 °C):  $\delta$  = 8.44 (s, 2H, CHN), 7.81 (ho m, 4H, Ph-substituent, *ortho*-H), 7.44 (ho m, 4H, Ph-substituent, *meta*-H), 7.32 (ho m, 2H, Ph-substituent, *para*-H), 6.85 (dd, 2H,  $^3J_{\text{H,H}}$  = 8.3 Hz,  $^4J_{\text{H,H}}$  = 2.2 Hz, CHCHCO), 6.66 (d, 2H,  $^4J_{\text{H,H}}$  = 2.0 Hz, CCHC), 6.43 (d, 2H,  $^3J_{\text{H,H}}$  = 8.2 Hz, CHCHCO), 4.53 (ho m, 4H, CCH<sub>2</sub>CH<sub>2</sub>N),

4.04 (d, 2H,  $^2J_{H,H} = -13.2$  Hz,  $^{Bn}CH_2[H_b]$ ), 3.43 (d, 2H,  $^2J_{H,H} = -13.2$  Hz,  $^{Bn}CH_2[H_a]$ ), 3.25 (d, 2H,  $^2J_{H,H} = -17.2$  Hz,  $CH_2[H_b]CO_2$ ), 3.00 (t, 4H,  $^3J_{H,H} = 7.5$  Hz,  $CCH_2CH_2N$ ), 2.91 (d, 2H,  $^2J_{H,H} = -17.2$  Hz,  $CH_2[H_a]CO_2$ ), 2.79 (homo, 4H, N-C<sub>2</sub>H<sub>4</sub>-N) ppm.  $^{13}C\{^1H\}$  NMR (100 MHz, d<sub>6</sub>-DMSO, 25 °C):  $\delta$  = 171.6 (CO<sub>2</sub>), 160.9 ( $^{PhO}C$ ), 146.0 (NCCH), 130.9 (Ph-substituent, *ipso*-C), 129.7 (CCHC), 129.0 (CHCHCO), 128.9 (Ph-substituent, *meta*-C), 127.7 (Ph-substituent, *para*-C), 125.1 (Ph-substituent, *ortho*-C), 122.4 (CCH<sub>2</sub>CH<sub>2</sub>N), 121.4 (CHN), 120.8 ( $^{Bn}CH_2C$ ), 119.6 (CHCHCO), 60.85 ( $^{Bn}C$ ), 56.9 (CH<sub>2</sub>CO<sub>2</sub>), 55.9 (N-C<sub>2</sub>H<sub>4</sub>-N), 51.4 (CCH<sub>2</sub>CH<sub>2</sub>N), 35.2 (CCH<sub>2</sub>CH<sub>2</sub>N) ppm. HRMS (ESI<sup>-</sup>):  $m/z$  [M]<sup>-</sup> Calcd for C<sub>40</sub>H<sub>38</sub>AlN<sub>8</sub>O<sub>6</sub>: 753.2735; Found: 753.2730 (100%).

## Structural data of isomers I–III

Portions of the HMBC spectrum of  $[\text{Al-HBED-NN}]^-\text{Na}^+$  showing regions for all observed and unobserved  $^1\text{H}$ – $^{13}\text{C}$  three-bond correlations for the chelate cage are presented in Fig. S1. Structural details of the DFT-optimized  $[\text{Al-HBED}]^-$  structures of isomers **I–III** including expected vs. observed correlations and dihedral and bond angles are presented in Tables S1–5.

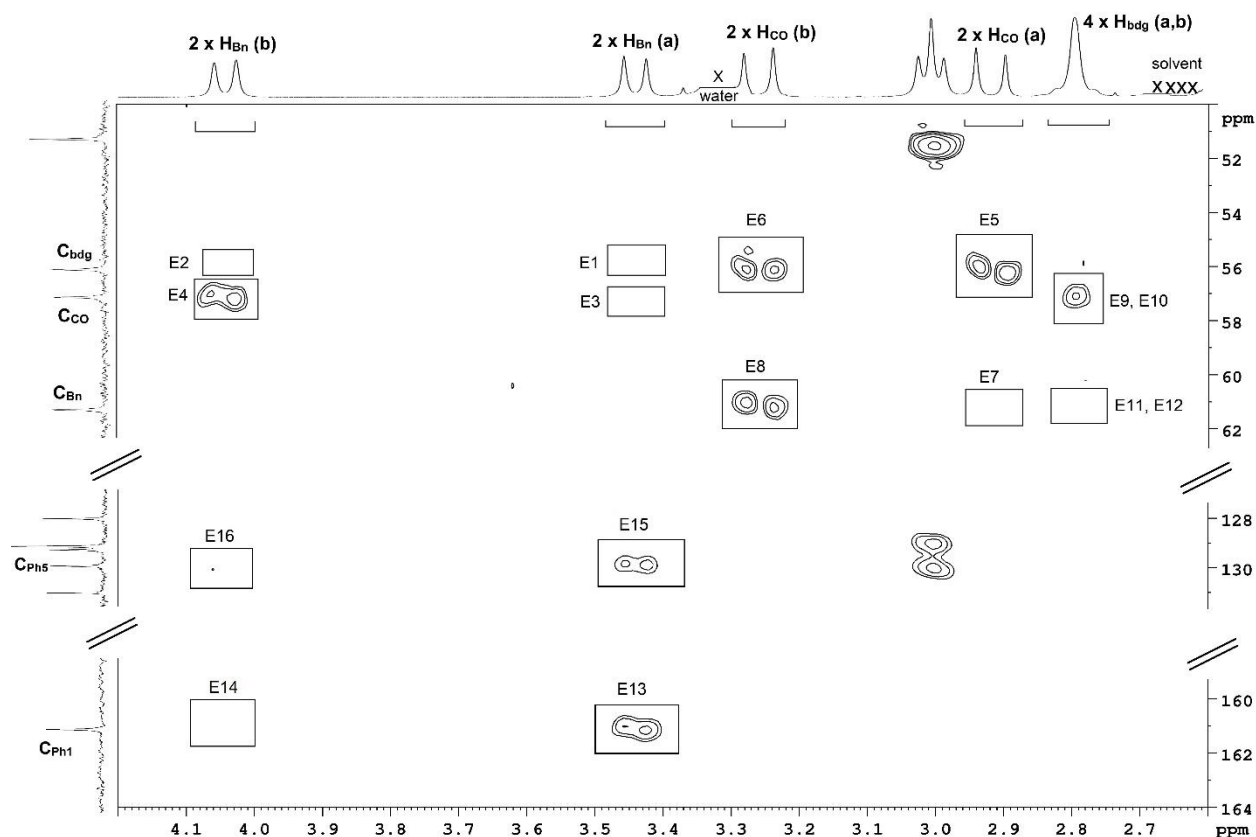

**Fig. S1** Portions of the  $^1\text{H}\{^{13}\text{C}\}$ -HMBC spectrum of  $[\text{Al-HBED-NN}]^-\text{Na}^+$  showing regions for all observed and unobserved  $^1\text{H}$ – $^{13}\text{C}$  three-bond correlations for the chelate cage.

**Table S1** Dihedral angles of the chelate cage and expected vs. observed correlations for isomer II

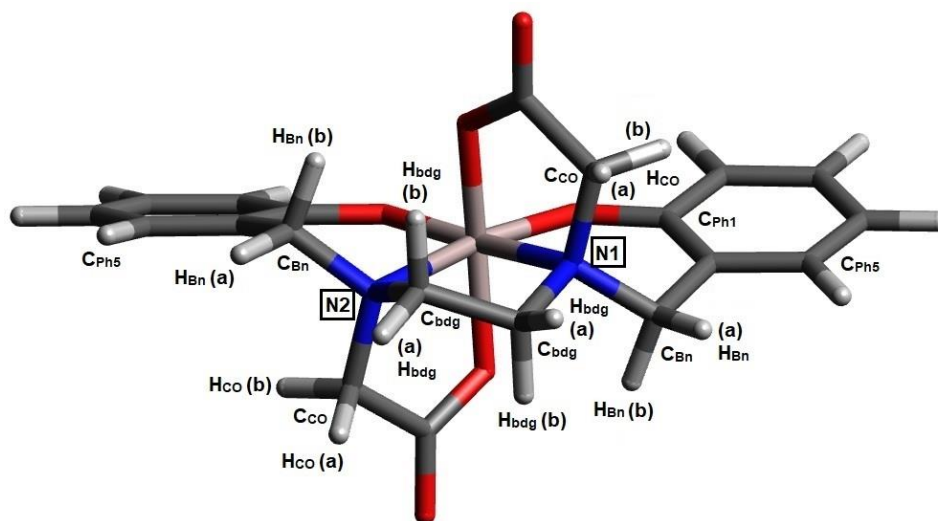

| Entry | Nuclei <sup>a</sup>                   | Dihedral angle (°) |                 | Correlation |                  |
|-------|---------------------------------------|--------------------|-----------------|-------------|------------------|
|       |                                       | N1 <sup>b</sup>    | N2 <sup>b</sup> | Expected    | Observed         |
| E1    | H <sub>Bn</sub> (a), C <sub>bdg</sub> | 59.56              | 59.57           | No          | No               |
| E2    | H <sub>Bn</sub> (b), C <sub>bdg</sub> | 56.29              | 56.28           | No          | No               |
| E3    | H <sub>Bn</sub> (a), C <sub>Co</sub>  | 65.01              | 65.00           | No          | No               |
| E4    | H <sub>Bn</sub> (b), C <sub>Co</sub>  | 179.15             | 179.15          | Yes         | Yes              |
| E5    | H <sub>Co</sub> (a), C <sub>bdg</sub> | 27.86              | 27.86           | Yes         | Yes              |
| E6    | H <sub>Co</sub> (b), C <sub>bdg</sub> | 146.15             | 146.15          | Yes         | Yes              |
| E7    | H <sub>Co</sub> (a), C <sub>Bn</sub>  | 96.09              | 96.08           | No          | No               |
| E8    | H <sub>Co</sub> (b), C <sub>Bn</sub>  | 22.21              | 22.21           | Yes         | Yes              |
| E9    | H <sub>bdg</sub> (a), C <sub>Co</sub> | 46.19              | 46.18           | No          | Yes <sup>c</sup> |
| E10   | H <sub>bdg</sub> (b), C <sub>Co</sub> | 163.20             | 163.19          | Yes         | Yes              |
| E11   | H <sub>bdg</sub> (a), C <sub>Bn</sub> | 78.69              | 78.69           | No          | No               |
| E12   | H <sub>bdg</sub> (b), C <sub>Bn</sub> | 38.32              | 38.32           | No          | No               |
| E13   | H <sub>Bn</sub> (a), C <sub>Ph1</sub> | 167.12             | 167.11          | Yes         | Yes              |
| E14   | H <sub>Bn</sub> (b), C <sub>Ph1</sub> | 74.40              | 74.41           | No          | No               |
| E15   | H <sub>Bn</sub> (a), C <sub>Ph5</sub> | 15.75              | 15.77           | Yes         | Yes              |
| E16   | H <sub>Bn</sub> (b), C <sub>Ph5</sub> | 102.73             | 102.72          | No          | No               |

**Table S2** Dihedral angles of the chelate cage and expected vs. observed correlations for isomer I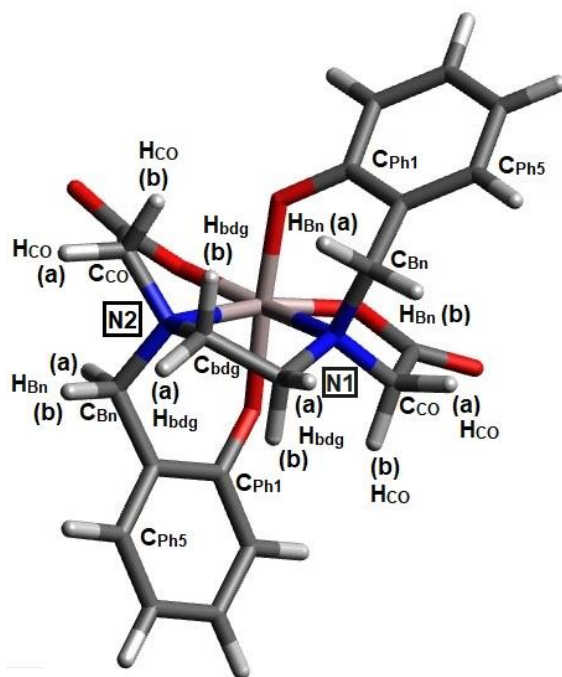

| Entry | Nuclei <sup>a</sup>                   | Dihedral angle (°) |                 | Correlation |                  |
|-------|---------------------------------------|--------------------|-----------------|-------------|------------------|
|       |                                       | N1 <sup>b</sup>    | N2 <sup>b</sup> | Expected    | Observed         |
| E1    | HBn (a), C <sub>bdg</sub>             | 39.57              | 173.62          | Yes         | No               |
| E2    | HBn (b), C <sub>bdg</sub>             | 75.14              | 58.96           | No          | No               |
| E3    | HBn (a), C <sub>CO</sub>              | 167.59             | 45.25           | Yes         | No               |
| E4    | HBn (b), C <sub>CO</sub>              | 52.87              | 69.40           | No          | Yes              |
| E5    | H <sub>CO</sub> (a), C <sub>bdg</sub> | 89.37              | 81.18           | No          | Yes              |
| E6    | H <sub>CO</sub> (b), C <sub>bdg</sub> | 30.28              | 40.04           | No          | Yes              |
| E7    | H <sub>CO</sub> (a), C <sub>Bn</sub>  | 34.06              | 44.30           | No          | No               |
| E8    | H <sub>CO</sub> (b), C <sub>Bn</sub>  | 153.71             | 165.51          | Yes         | Yes              |
| E9    | H <sub>bdg</sub> (a), C <sub>CO</sub> | 84.70              | 93.90           | No          | Yes <sup>c</sup> |
| E10   | H <sub>bdg</sub> (b), C <sub>CO</sub> | 33.69              | 23.33           | Yes         | Yes              |
| E11   | H <sub>bdg</sub> (a), C <sub>Bn</sub> | 39.81              | 29.01           | No          | No               |
| E12   | H <sub>bdg</sub> (b), C <sub>Bn</sub> | 158.20             | 146.25          | Yes         | No               |
| E13   | HBn (a), C <sub>Ph1</sub>             | 64.38              | 67.99           | No          | Yes              |
| E14   | HBn (b), C <sub>Ph1</sub>             | 178.59             | 174.53          | Yes         | No               |
| E15   | HBn (a), C <sub>Ph5</sub>             | 109.47             | 107.29          | No          | Yes              |
| E16   | HBn (b), C <sub>Ph5</sub>             | 7.56               | 10.19           | Yes         | No               |

**Table S3** Dihedral angles of the chelate cage and expected vs. observed correlations for isomer **III** using averaged values for predicting correlations

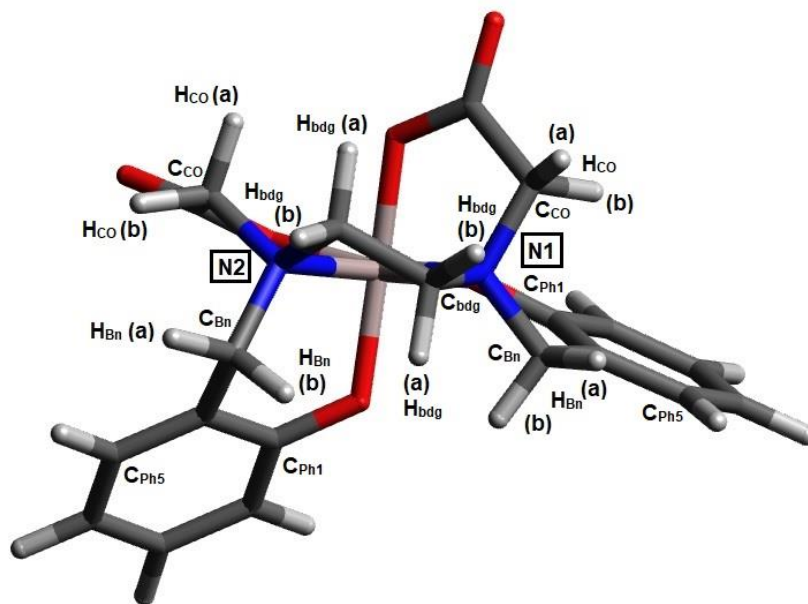

| Entry | Nuclei <sup>a</sup>                   | Dihedral angle (°), N1 <sup>b</sup> | Expected correlation | Dihedral angle (°), N2 <sup>b</sup> | Expected correlation | Correlation |                  |
|-------|---------------------------------------|-------------------------------------|----------------------|-------------------------------------|----------------------|-------------|------------------|
|       |                                       |                                     |                      |                                     |                      | Combined    | Observed         |
| E1    | H <sub>Bn</sub> (a), C <sub>bdg</sub> | 59.00                               | No                   | 76.85                               | No                   | No          | No               |
| E2    | H <sub>Bn</sub> (b), C <sub>bdg</sub> | 56.92                               | No                   | 38.14                               | No                   | No          | No               |
| E3    | H <sub>Bn</sub> (a), C <sub>CO</sub>  | 65.75                               | No                   | 51.10                               | No                   | No          | No               |
| E4    | H <sub>Bn</sub> (b), C <sub>CO</sub>  | 178.32                              | Yes                  | 166.08                              | Yes                  | Yes         | Yes              |
| E5    | H <sub>CO</sub> (a), C <sub>bdg</sub> | 34.38                               | No                   | 28.27                               | Yes                  | Yes         | Yes              |
| E6    | H <sub>CO</sub> (b), C <sub>bdg</sub> | 152.81                              | Yes                  | 91.57                               | No                   | No          | Yes              |
| E7    | H <sub>CO</sub> (a), C <sub>Bn</sub>  | 90.37                               | No                   | 152.64                              | Yes                  | No          | No               |
| E8    | H <sub>CO</sub> (b), C <sub>Bn</sub>  | 28.05                               | Yes                  | 32.81                               | No                   | Yes         | Yes              |
| E9    | H <sub>bdg</sub> (a), C <sub>CO</sub> | 157.84                              | Yes                  | 33.83                               | No                   | Yes         | Yes              |
| E10   | H <sub>bdg</sub> (b), C <sub>CO</sub> | 41.20                               | No                   | 84.32                               | No                   | No          | Yes <sup>c</sup> |
| E11   | H <sub>bdg</sub> (a), C <sub>Bn</sub> | 32.43                               | No                   | 158.86                              | Yes                  | Yes         | No               |
| E12   | H <sub>bdg</sub> (b), C <sub>Bn</sub> | 84.21                               | No                   | 40.71                               | No                   | No          | No               |
| E13   | H <sub>Bn</sub> (a), C <sub>Ph1</sub> | 158.82                              | Yes                  | 178.88                              | Yes                  | Yes         | Yes              |
| E14   | H <sub>Bn</sub> (b), C <sub>Ph1</sub> | 82.76                               | No                   | 64.20                               | No                   | No          | No               |
| E15   | H <sub>Bn</sub> (a), C <sub>Ph5</sub> | 24.06                               | Yes                  | 7.04                                | Yes                  | Yes         | Yes              |
| E16   | H <sub>Bn</sub> (b), C <sub>Ph5</sub> | 94.37                               | No                   | 109.87                              | No                   | No          | No               |

**Table S4** Dihedral angles of the chelate cage and expected vs. observed correlations for isomer **III** based on predicting a correlation if one dihedral angle is favorable

| Entry | Nuclei <sup>a</sup>                   | Dihedral angle (°), N1 <sup>b</sup> | Expected correlation | Dihedral angle (°), N2 <sup>b</sup> | Expected correlation | Correlation |                  |
|-------|---------------------------------------|-------------------------------------|----------------------|-------------------------------------|----------------------|-------------|------------------|
|       |                                       |                                     |                      |                                     |                      | Combined    | Observed         |
| E1    | H <sub>Bn</sub> (a), C <sub>bdg</sub> | 59.00                               | No                   | 76.85                               | No                   | No          | No               |
| E2    | H <sub>Bn</sub> (b), C <sub>bdg</sub> | 56.92                               | No                   | 38.14                               | No                   | No          | No               |
| E3    | H <sub>Bn</sub> (a), C <sub>Co</sub>  | 65.75                               | No                   | 51.10                               | No                   | No          | No               |
| E4    | H <sub>Bn</sub> (b), C <sub>Co</sub>  | 178.32                              | Yes                  | 166.08                              | Yes                  | Yes         | Yes              |
| E5    | H <sub>Co</sub> (a), C <sub>bdg</sub> | 34.38                               | No                   | 28.27                               | Yes                  | Yes         | Yes              |
| E6    | H <sub>Co</sub> (b), C <sub>bdg</sub> | 152.81                              | Yes                  | 91.57                               | No                   | Yes         | Yes              |
| E7    | H <sub>Co</sub> (a), C <sub>Bn</sub>  | 90.37                               | No                   | 152.64                              | Yes                  | Yes         | No               |
| E8    | H <sub>Co</sub> (b), C <sub>Bn</sub>  | 28.05                               | Yes                  | 32.81                               | No                   | Yes         | Yes              |
| E9    | H <sub>bdg</sub> (a), C <sub>Co</sub> | 157.84                              | Yes                  | 33.83                               | No                   | Yes         | Yes              |
| E10   | H <sub>bdg</sub> (b), C <sub>Co</sub> | 41.20                               | No                   | 84.32                               | No                   | No          | Yes <sup>c</sup> |
| E11   | H <sub>bdg</sub> (a), C <sub>Bn</sub> | 32.43                               | No                   | 158.86                              | Yes                  | Yes         | No               |
| E12   | H <sub>bdg</sub> (b), C <sub>Bn</sub> | 84.21                               | No                   | 40.71                               | No                   | No          | No               |
| E13   | H <sub>Bn</sub> (a), C <sub>Ph1</sub> | 158.82                              | Yes                  | 178.88                              | Yes                  | Yes         | Yes              |
| E14   | H <sub>Bn</sub> (b), C <sub>Ph1</sub> | 82.76                               | No                   | 64.20                               | No                   | No          | No               |
| E15   | H <sub>Bn</sub> (a), C <sub>Ph5</sub> | 24.06                               | Yes                  | 7.04                                | Yes                  | Yes         | Yes              |
| E16   | H <sub>Bn</sub> (b), C <sub>Ph5</sub> | 94.37                               | No                   | 109.87                              | No                   | No          | No               |

**Table S5** Selected bond angles (°) and bond lengths (Å) for isomers **I–III**

| Angle <sup>b,d</sup>       | I <sup>e</sup> | II    | III <sup>e</sup> | [Ti-HBED] <sup>f</sup> |
|----------------------------|----------------|-------|------------------|------------------------|
| C <sub>C=O</sub> –O–Al, N1 | 116.1          | 122.0 | 119.8            | 124.7                  |
| C <sub>C=O</sub> –O–Al, N2 | 113.9          | 121.9 | 118.5            | 123.0                  |
| C <sub>Ph</sub> –O–Al, N1  | 123.0          | 133.5 | 129.3            | 140.1                  |
| C <sub>Ph</sub> –O–Al, N2  | 134.8          | 133.5 | 122.0            | 140.3                  |
| C <sub>Co</sub> –N–Al, N1  | 100.4          | 106.8 | 106.3            | 108.0                  |
| C <sub>Co</sub> –N–Al, N2  | 99.2           | 106.8 | 101.7            | 106.6                  |
| C <sub>Bn</sub> –N–Al, N1  | 116.0          | 110.3 | 108.6            | 112.2                  |
| C <sub>Bn</sub> –N–Al, N2  | 113.8          | 110.3 | 115.0            | 113.1                  |

|                                           |       |       |       |       |
|-------------------------------------------|-------|-------|-------|-------|
| C <sub>bdg</sub> -N-Al, N1                | 106.0 | 106.0 | 107.6 | 106.8 |
| C <sub>bdg</sub> -N-Al, N2                | 108.5 | 106.0 | 105.1 | 107.7 |
| O <sub>CO</sub> -Al-O <sub>CO</sub>       | 113.3 | 165.6 | 87.0  | 156.7 |
| O <sub>CO,N1</sub> -Al-O <sub>Ph,N1</sub> | 91.3  | 97.1  | 92.6  | 100.1 |
| O <sub>CO,N1</sub> -Al-O <sub>Ph,N2</sub> | 84.7  | 92.6  | 173.0 | 93.0  |
| O <sub>CO,N1</sub> -Al-N <sub>N1</sub>    | 83.5  | 81.1  | 80.7  | 77.4  |
| O <sub>CO,N1</sub> -Al-N <sub>N2</sub>    | 164.7 | 88.2  | 86.1  | 84.7  |
| O <sub>CO,N2</sub> -Al-O <sub>Ph,N1</sub> | 85.3  | 92.6  | 102.8 | 93.2  |
| O <sub>CO,N2</sub> -Al-O <sub>Ph,N2</sub> | 95.6  | 97.1  | 96.3  | 100.5 |
| O <sub>CO,N2</sub> -Al-N <sub>N1</sub>    | 161.7 | 88.2  | 162.4 | 84.6  |
| O <sub>CO,N2</sub> -Al-N <sub>N2</sub>    | 80.8  | 81.1  | 82.8  | 77.6  |
| O <sub>Ph</sub> -Al-O <sub>Ph</sub>       | 176.0 | 95.9  | 92.8  | 109.7 |
| O <sub>Ph,N1</sub> -Al-N <sub>N1</sub>    | 87.2  | 90.6  | 90.4  | 86.0  |
| O <sub>Ph,N1</sub> -Al-N <sub>N2</sub>    | 95.3  | 171.5 | 174.3 | 163.8 |
| O <sub>Ph,N2</sub> -Al-N <sub>N1</sub>    | 93.0  | 171.5 | 94.7  | 163.1 |
| O <sub>Ph,N2</sub> -Al-N <sub>N2</sub>    | 88.6  | 90.6  | 88.1  | 85.3  |
| N-Al-N                                    | 83.3  | 83.5  | 83.9  | 80.0  |
| O <sub>CO,N1</sub> -Al                    | 1.885 | 1.908 | 1.940 | 1.954 |
| O <sub>CO,N2</sub> -Al                    | 1.895 | 1.908 | 1.876 | 1.956 |
| O <sub>Ph,N1</sub> -Al                    | 1.895 | 1.830 | 1.834 | 1.812 |
| O <sub>Ph,N2</sub> -Al                    | 1.881 | 1.830 | 1.865 | 1.812 |
| N <sub>N1</sub> -Al                       | 2.154 | 2.168 | 2.119 | 2.246 |
| N <sub>N2</sub> -Al                       | 2.134 | 2.168 | 2.173 | 2.234 |

<sup>a</sup> "C<sub>CO</sub>" refers to the methylene carbon adjacent to the carbonyl carbon.

<sup>b</sup> N1 and N2 refer to the half of the ligand in which the measurement was made.

<sup>c</sup> Due to overlap of the H<sub>bdg</sub> (a) and (b) protons for which a correlation is expected for one of them.

<sup>d</sup> "C<sub>C=O</sub>" refers to the carbonyl carbon.

<sup>e</sup> For isomers I and III and [Ti-HBED], yellow highlights indicate a large deviation on the side experiencing steric interaction between the phenyl and the acetyl groups; blue highlights indicate a large deviation on the other side. A large bond angle deviation is defined as > 4°.

<sup>f</sup> Ref S3

<sup>1</sup>H NMR (MeOD)

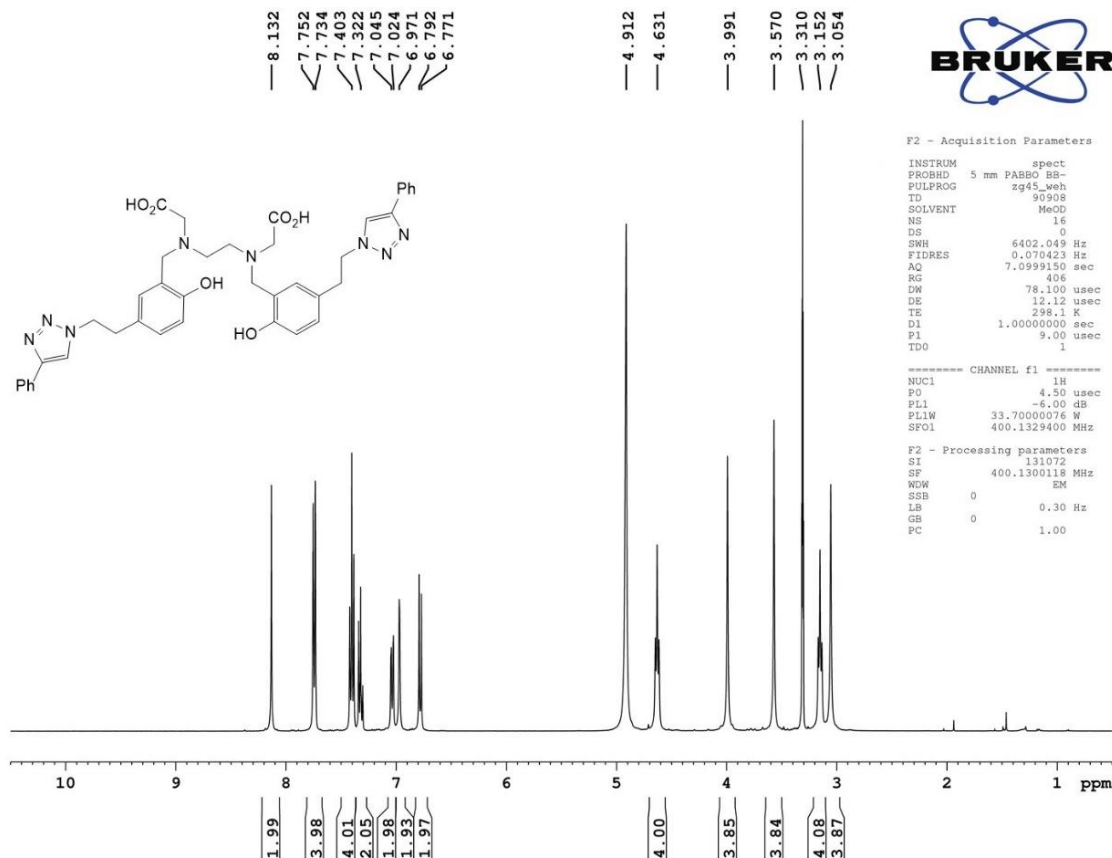

<sup>13</sup>C NMR (MeOD)

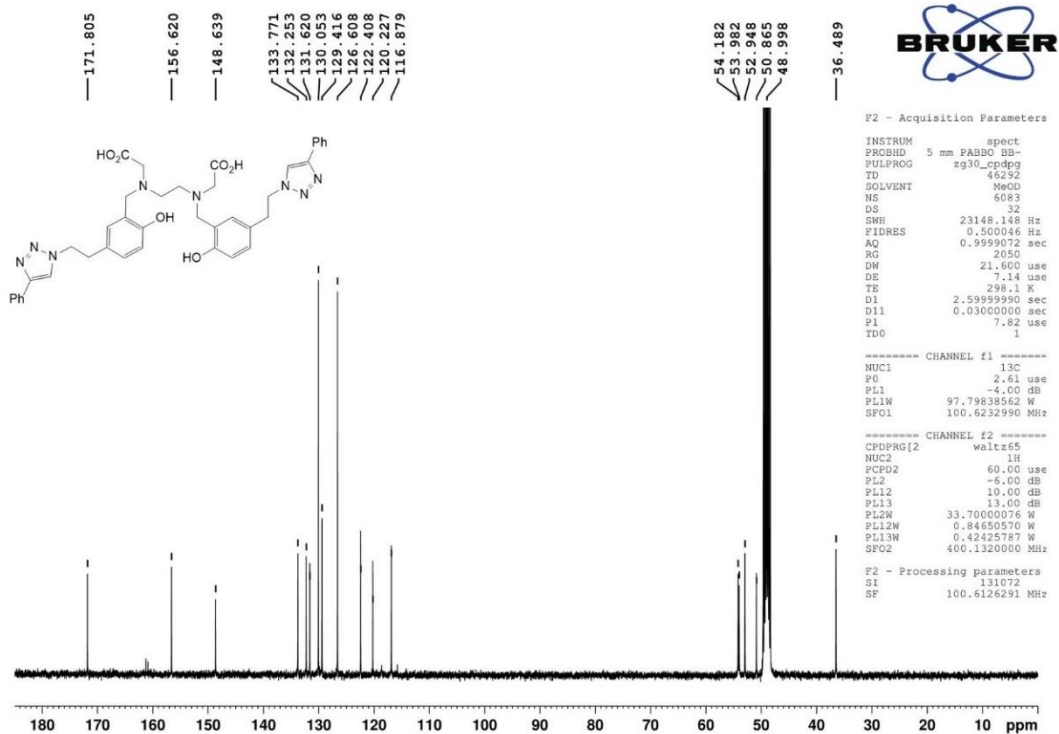

$^1\text{H}$  NMR ( $d_6$ -DMSO)

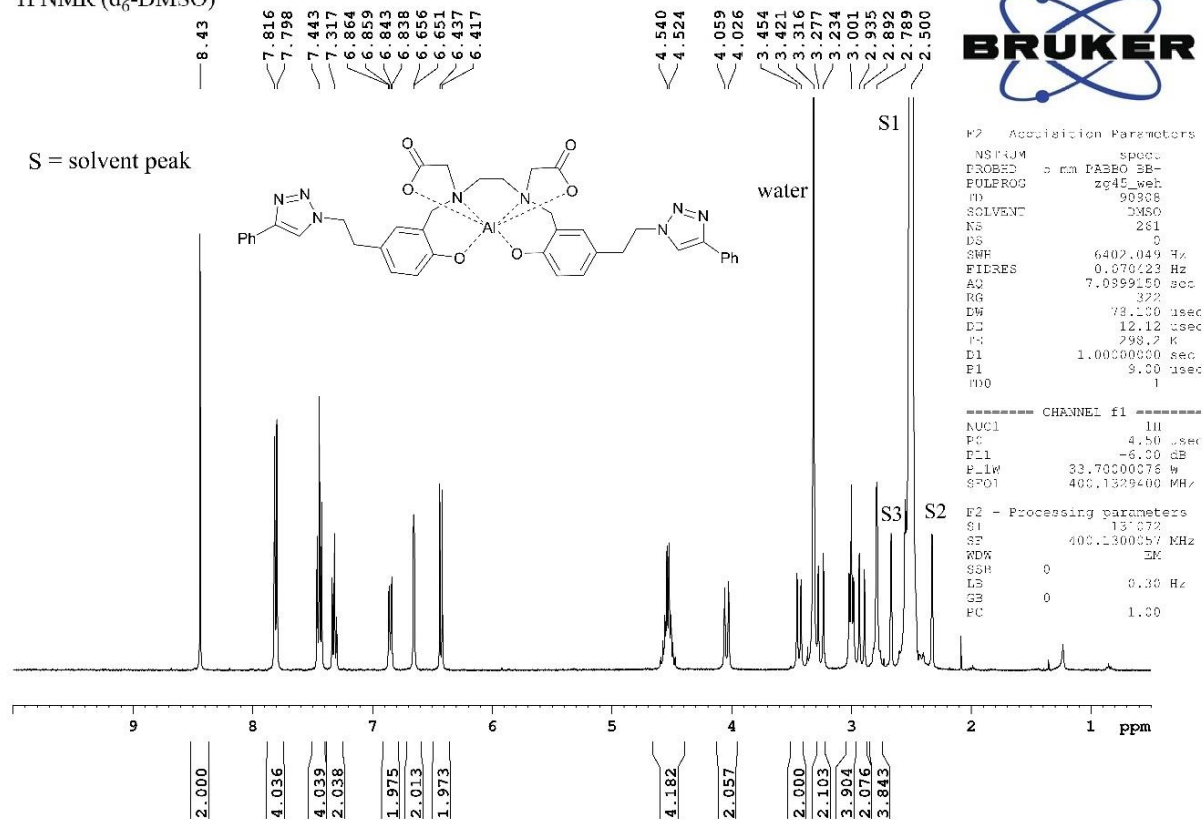

$^{13}\text{C}$  NMR ( $d_6$ -DMSO)

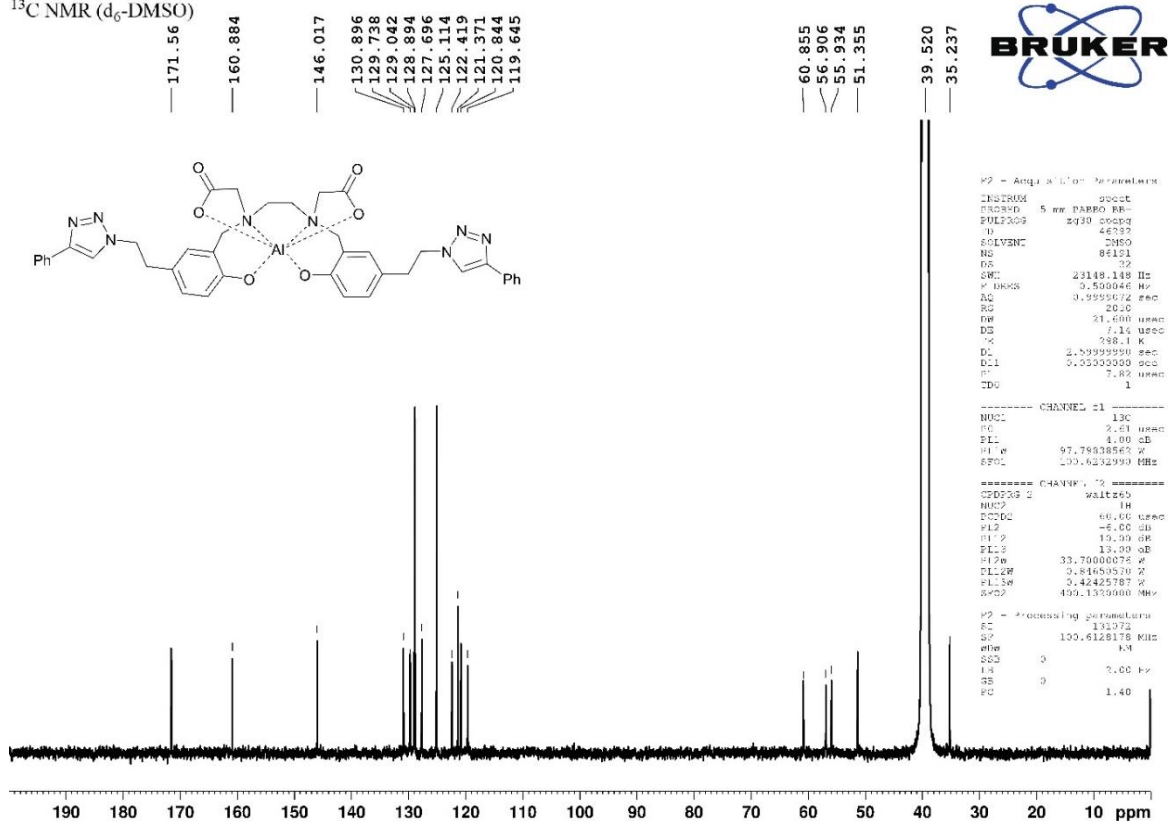

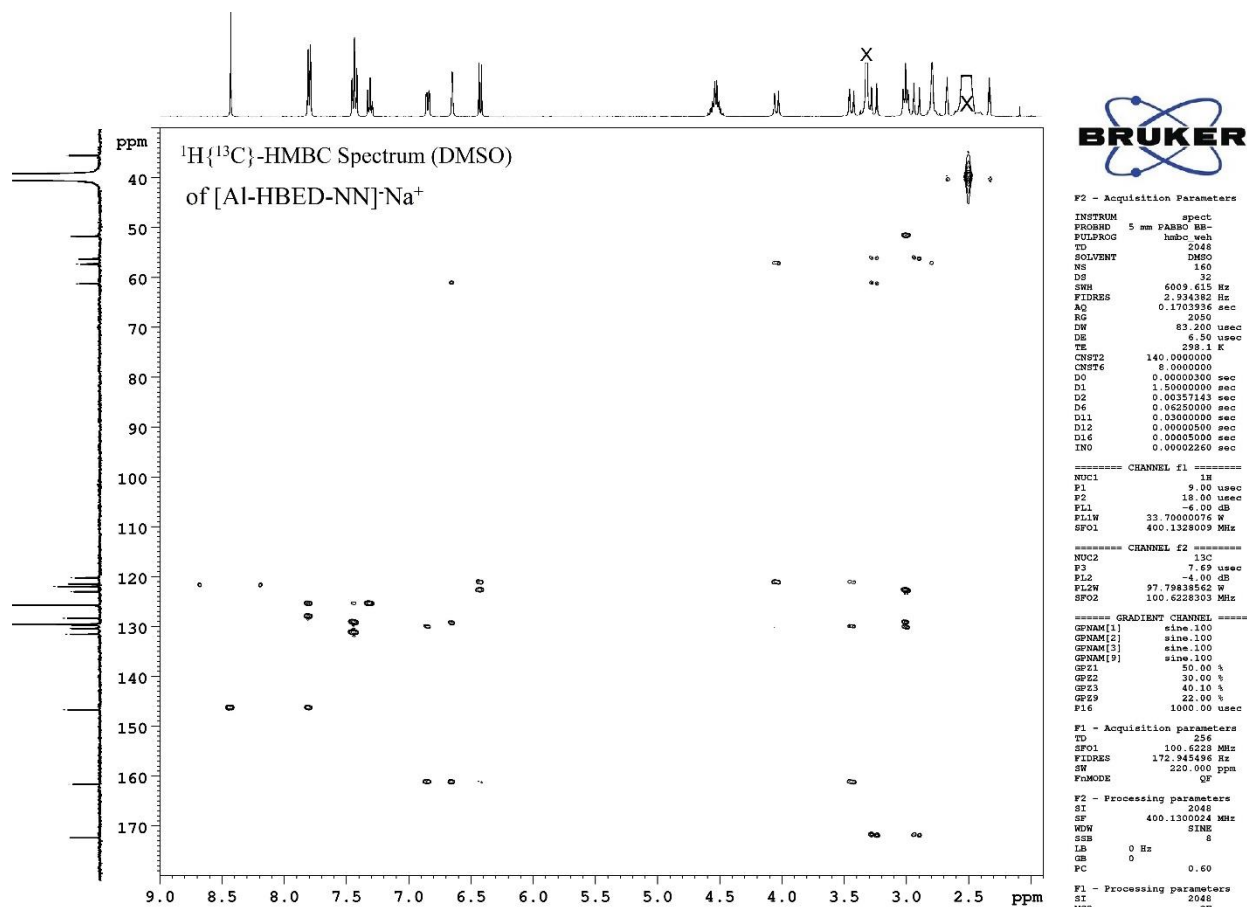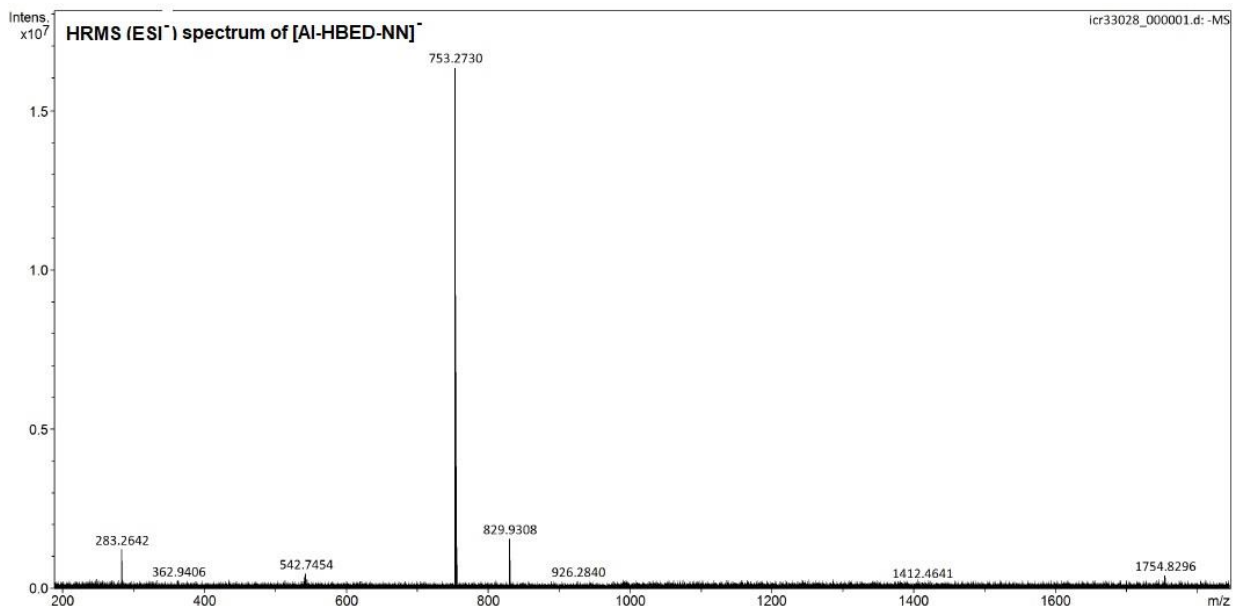

## References

- S1 G. R. Fulmer, A. J. M. Miller, N. H. Sherden, H. E. Gottlieb, A. Nudelman, B. M. Stoltz, J. E. Bercaw and K. I. Goldberg, *Organometallics*, 2010, **29**, 2176–2179.
- S2 A. Makarem, K. D. Klika, G. Litau, Y. Remde and K. Kopka, *J. Org. Chem.*, 2019, **84**, 7501–7508.
- S3 A. D. Tinoco, C. D. Incarvito and A. M. Valentine, *J. Am. Chem. Soc.*, 2007, **129**, 3444–3454.
